# Supplementary material for: Cloning and Functional Characterization of SpZIP2
Source: MDPI journal article supplement (doi:10.3390/genes13122395), 2022-12-17
Supplement: s1 [file s1]

**Table S1** List of primer sequences used in this study

| Primer name   | Primer Sequences (5'–3')                            |
|---------------|-----------------------------------------------------|
| SpZIP2-B-L    | <u>cgggatcc</u> ATGTCATCCCTCTCTCAGT                 |
| SpZIP2-E-R    | <u>cggaattc</u> TCAGTCCCATATCATGACC                 |
| SpZIP2-E-R2   | <u>gggatcctcctcctcctcctcctcc</u> GTCCCATATCATGACCAC |
| SpZIP2-qRT-F  | TGCAGCATCTCATCAGGCAA                                |
| SpZIP2-qRT-R  | GCGCTTTCCATGCGTCTTTT                                |
| SpActin-qRT-F | ATGTTCCCTGGTATTGCTGACCGT                            |
| SpActin-qRT-R | TCCACATCTGCTGGAAGGTGCTTA                            |

Restriction endonucleases sites were underlined
