# Supplementary material for: Cloning and Functional Characterization of SpZIP2
Source: MDPI journal article supplement (doi:10.3390/genes13122395), 2022-12-17
Supplement: s1 [file s1]

**Table S2. Coding sequence and amino acid composition of SpZIP2**

| SpZIP2                     | Sequences                                                                                                                                                                                                                                                                                                                                                                                                                                                                                                                                                                                                                                                                                                                                                                                                                                                                                                                                                                                                                                                                                                                                                                         |
|----------------------------|-----------------------------------------------------------------------------------------------------------------------------------------------------------------------------------------------------------------------------------------------------------------------------------------------------------------------------------------------------------------------------------------------------------------------------------------------------------------------------------------------------------------------------------------------------------------------------------------------------------------------------------------------------------------------------------------------------------------------------------------------------------------------------------------------------------------------------------------------------------------------------------------------------------------------------------------------------------------------------------------------------------------------------------------------------------------------------------------------------------------------------------------------------------------------------------|
| <b>Coding sequence</b>     | <p>ATGTCATCCCTCTCTCAGTCTCTACTCCCACTCCTCCTAACCTCTTCCTCATC<br/> CTCTACTCTGCCGCCGCTCACGGAGGCCACAGCGACGAAGACACAGGCTC<br/> AGAAACAGAGCAAAAACCTGCTCTACGTTCAAAAGCGCTAATTCTTGTA<br/> GATCTGGTGTTAATCATTGTCTTTTTCGCCACTTTCTTCGGCGGTGTCTCTC<br/> CGTACTTCCTTAAATGGAACGAGGGGTTTCTTGTCCTCGGCACGCAGTTTG<br/> CTGGCGGCGTGTTTCTCGGAACGGCGATGATGCATTTTTTAAGTGATTGCA<br/> ATGCGACTTTTGGGGATTGACGGAGAAGGAGTATCCGTTTCGCTTTCATGT<br/> TAGCCTGCGGTGGGTATTAGTGACCATGTTGGCCGATTGCGTCATCACTTA<br/> CGTCATTGATAAACAGAGGATTCGGAATGGCTCTGCTGCCGATGTTGAGCT<br/> GCAAGGCGAAGCTGTGGTGATAACAAGTTGAAGTCAAGCCATGATGCAG<br/> CATCTCATCAGGCAACTCTTCAAACAACCGCAGCTACTTCTCTAGGAGACA<br/> GTGTACTTCTAATCGTAGCCTTATGTTTCCACTCAGTATTCGAAGGCATCGCC<br/> ATCGGTGTTGCCGACACCGAAAAAGACGCATGGAAAGCGCTGTGGACAGT<br/> CAGCTTACACAAGGTGTTTGCAGCAATAGCTATGGGCATTGCTCTTCTCAGA<br/> ATGATACCAGATCGGCCATTGCTATCAACCGTGGCCTACGCATTGCTTTTCG<br/> CCATTCAAGTCCGATCGGGGTGGCTATCGGGATTGTGATCGATGCAACGA<br/> CGCAAGGGTCGGTTGCGGATTGGATTATGCTATTTTCGATGGGAGTGGCTA<br/> CTGGGATTTTATCTATGTTTCGATTAAACCATCTGTTGGCAAAGGGGTATGTA<br/> GCTCGAAAGATAGTTTCTGTGGACACGGCGGTTTATAAGCTTCTGGCTGTG<br/> AGTTTGGGTATTGGGGTTATTGCTGTGGTCATGATATGGGACTGA</p> |
| <b>Amino acid sequence</b> | <p>MSSLQSLLPLLLTLFLILYSAAAHGGHSDSDTGSETEQKPALRSKALILVKIWCLI<br/> IVFFATFFGGVSPYFLKWNEGFLVLGTQFAGGVFLGTAMMHFLSDSNATFGDL<br/> TEKEYPFAFMLACGGYLVTMLADCVITYVIDKQIRNGSAADVELQGEAVVD<br/> NKLKSSHDAASHQATLQTTAATSLGDSVLLIVALCFHVSFEGIAIGVADTEKDA<br/> WKALWTVSLHKVFAAIAMGIALLRMIPDRPLLSTVAYAFIFAISPIGVAIGIVI<br/> DATTQGSVADWIYAISMGVATGIFIYVSINHLLAKGYVARKIVSVDTAVYKLLAV<br/> SLGIGVIAVVMIIWD</p>                                                                                                                                                                                                                                                                                                                                                                                                                                                                                                                                                                                                                                                                                                                                                                                     |
